# Supplementary material for: Flax Fiber Hydrophobic Extract Inhibits Human Skin Cells Inflammation and Causes Remodeling of Extracellular Matrix and Wound Closure Activation
Source: Hindawi journal article supplement (doi:10.1155/2015/862391), 2015-01-01
Supplement: f1 [file 862391.f1.pdf]

**Supl. Tab. 1. Fatty acid content of the flax fiber hydrophobic extract.**

| <b>Fatty acid</b>        | <b>mg/ml</b> | <b>SD</b> |
|--------------------------|--------------|-----------|
| Palmitic acid (C16:0)    | 1,256137     | 0,081443  |
| Stearic acid (C18:0)     | 0,567735     | 0,023902  |
| Oleic acid (C18:1)       | 0,937371     | 0,071147  |
| Linoleic acid (C18:2)    | 0,524228     | 0,050684  |
| Linolenic acid (C18:3)   | 0,053752     | 0,032993  |
| Arachidic acid (C20:0)   | 0,150098     | 0,007229  |
| Behenic acid (C22:0)     | 0,149498     | 0,013821  |
| Tricosanoic acid (C23:0) | 0,112541     | 0,017819  |
| Lignoceric acid (C24:0)  | 0,200285     | 0,029965  |
